# Supplementary material
Source: PubMed Central journal article supplement (PMC4285969)

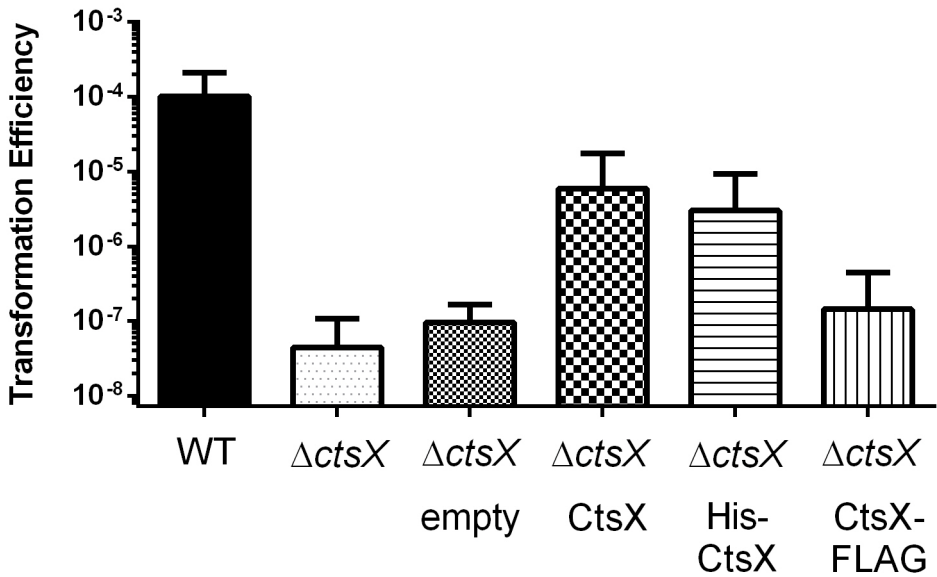

Supplement: JB.02434-14_zjb999093484so1.pdf [file JB.02434-14_zjb999093484so1.pdf]
